# Supplementary material
Source: PubMed Central journal article supplement (PMC2742597)
Supplement: bhn261_1.pdf [file bhn261_1.pdf]

**A. Tool use pantomime planning vs. linguistic control****Right Hand ( $z \geq 2.3$ ,  $p < 0.05$ , clusterwise corrected for multiple comparisons)**

| Region                                   | MNI         |     |     | Peak value<br>z-max |
|------------------------------------------|-------------|-----|-----|---------------------|
|                                          | coordinates |     |     |                     |
|                                          | x           | y   | z   |                     |
| Left caudal Ventral Premotor Area (cPMv) | -54         | 2   | 22  | 3.98                |
| Left Dorsal Premotor Area (PMd)          | -30         | -12 | 50  | 5.00                |
| Left Intraparietal Sulcus (IPS)          | -46         | -46 | 50  | 4.75                |
| Left Supramarginal Gyrus (SMG)           | -58         | -36 | 30  | 3.41                |
| Left Superior Parietal Gyrus (SPG)       | -10         | -72 | 50  | 4.48                |
| Left caudal Middle Temporal Gyrus (cMTG) | -58         | -70 | -6  | 3.82                |
| Left rostral Middle Frontal Gyrus (rMFG) | -34         | 46  | 34  | 3.93                |
| Left Thalamus                            | -16         | -8  | -2  | 3.78                |
| Left Supplementary Motor Area (SMA)      | -8          | -10 | 60  | 3.99                |
| Left anterior Cingulate Gyrus            | -8          | 6   | 42  | 3.99                |
| Left Motor Cortex                        | -34         | -26 | 60  | 3.79                |
| Left Cerebellum                          | -40         | -54 | -40 | 4.43                |
| Right Dorsal Premotor Area (PMd)         | 28          | -12 | 58  | 3.85                |
| Right Superior Parietal Gyrus (SPG)      | 14          | -70 | 50  | 3.84                |
| Right cerebellum                         | 32          | -56 | -38 | 4.52                |

**B. Intransitive gesture planning vs. linguistic control****Right Hand ( $z \geq 2.3$ ,  $p < 0.05$ , clusterwise corrected for multiple comparisons)**

| Region                                       | MNI         |     |     | Peak value<br>z-max |
|----------------------------------------------|-------------|-----|-----|---------------------|
|                                              | coordinates |     |     |                     |
|                                              | x           | y   | z   |                     |
| Left Dorsal Premotor Area (PMd)              | -28         | -10 | 48  | 4.41                |
| Left Intraparietal Sulcus (IPS)              | -42         | -46 | 58  | 4.60                |
| Left Supramarginal Gyrus (SMG)               | -56         | -38 | 48  | 4.11                |
| Left Superior Parietal Gyrus (SPG)           | -12         | -76 | 52  | 3.99                |
| Left caudal Middle Temporal Gyrus (cMTG)     | -48         | -62 | 2   | 3.71                |
| Left rostral Middle Frontal Gyrus (rMFG)     | -34         | 44  | 34  | 4.10                |
| Left Insular Cortex                          | -54         | 6   | -2  | 3.51                |
| Left Supplementary Motor Area (SMA)          | -6          | -10 | 60  | 3.00                |
| Left Inferior Temporal Gyrus                 | -52         | -72 | -14 | 3.10                |
| Left anterior Cingulate Gyrus                | -8          | 6   | 42  | 3.10                |
| Left Fusiform Gyrus                          | -44         | -58 | 20  | 3.00                |
| Right Fusiform Gyrus                         | 56          | -50 | -20 | 3.42                |
| Right Pre-Supplementary Motor Area (Pre-SMA) | 4           | 8   | 58  | 2.94                |
| Right cerebellum                             | 46          | -52 | -42 | 4.03                |

**C. Tool use pantomime planning vs. linguistic control****Left Hand ( $z \geq 2.3$ ,  $p < 0.05$ , clusterwise corrected for multiple comparisons)**

| Region                                       | MNI         |     |     | Peak value<br>z-max |
|----------------------------------------------|-------------|-----|-----|---------------------|
|                                              | coordinates |     |     |                     |
|                                              | x           | y   | z   |                     |
| Left Dorsal Premotor Area (PMd)              | -30         | -8  | 54  | 3.80                |
| Left Intraparietal Sulcus (IPS)              | -42         | -48 | 54  | 3.44                |
| Left Supramarginal Gyrus (SMG)               | -52         | -38 | 34  | 3.51                |
| Left Supplementary Motor Area (SMA)          | -6          | 4   | 50  | 3.13                |
| Left Cerebellum                              | -24         | -52 | -32 | 3.70                |
| Right Dorsal Premotor Area (PMd)             | 28          | -10 | 58  | 3.46                |
| Right Pre-Supplementary Motor Area (Pre-SMA) | 10          | 8   | 50  | 3.15                |

**D. Intransitive gesture planning vs. linguistic control****Left Hand ( $z \geq 2.3$ ,  $p < 0.05$ , clusterwise corrected for multiple comparisons)**

| Region                                   | MNI         |     |    | Peak value<br>z-max |
|------------------------------------------|-------------|-----|----|---------------------|
|                                          | coordinates |     |    |                     |
|                                          | x           | y   | z  |                     |
| Left Dorsal Premotor Area (PMd)          | -28         | -10 | 48 | 3.49                |
| Left Intraparietal Sulcus (IPS)          | -36         | -44 | 42 | 3.55                |
| Left Supramarginal Gyrus (SMG)           | -62         | -36 | 48 | 3.10                |
| Left rostral Middle Frontal Gyrus (rMFG) | -32         | 40  | 34 | 3.63                |

**E. Peak Coordinates for Region of Interest (ROI) clusters: Transitive > Rest****Right Hand ( $z \geq 3.1$ ,  $p < 0.05$ , clusterwise corrected for multiple comparisons)**

| Region                                                  | MNI         |     |     | Peak value<br>z-max |
|---------------------------------------------------------|-------------|-----|-----|---------------------|
|                                                         | coordinates |     |     |                     |
|                                                         | x           | y   | z   |                     |
| Left caudal Ventral Premotor (cPMv)                     | -52         | 0   | 28  | 3.99                |
| Left Dorsal Premotor (PMd)                              | -28         | -10 | 50  | 4.85                |
| Left Intraparietal Sulcus/Supramarginal gyrus (IPS/SMG) | -44         | -50 | 38  | 4.37                |
| Left Superior Parietal Gyrus (SPG)                      | -14         | -76 | 50  | 4.47                |
| Left caudal Middle Temporal Gyrus (cMTG)                | -54         | -72 | -10 | 4.49                |
| Left rostral Middle Frontal Gyrus (rMFG)                | -34         | 44  | 36  | 4.46                |
